# Supplementary material
Source: PubMed Central journal article supplement (PMC3382052)

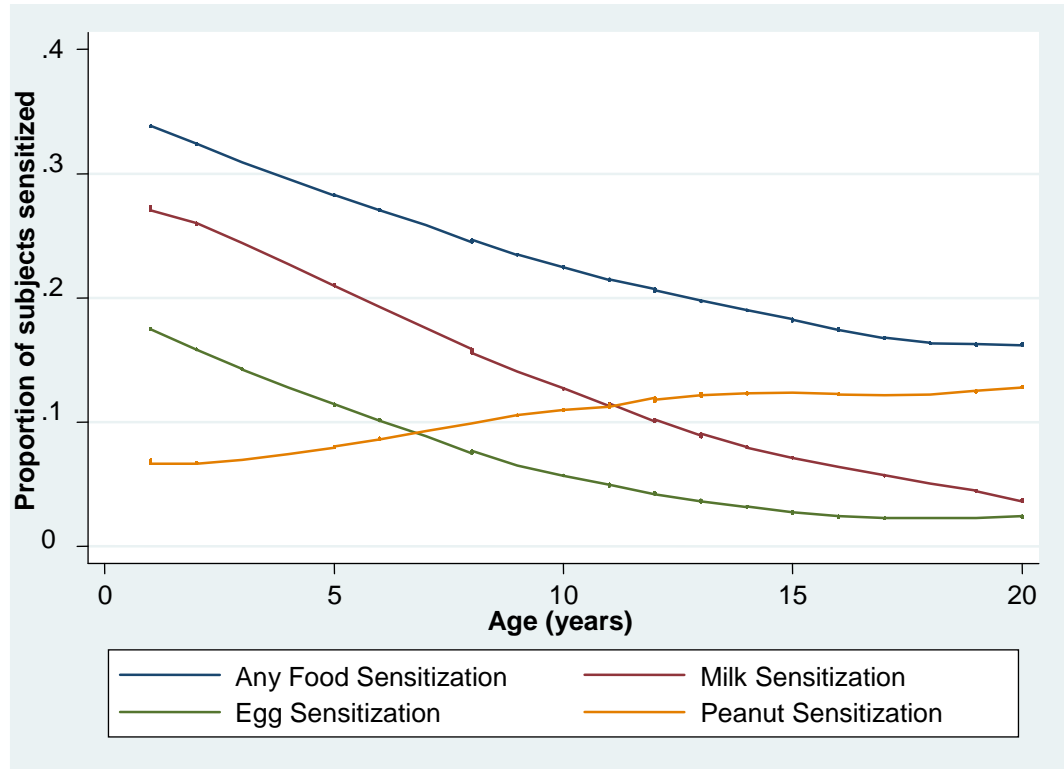

Supplement: NIHMS330434-supplement-1.pdf [file NIHMS330434-supplement-1.pdf]
